# Supplementary material
Source: PubMed Central journal article supplement (PMC2718173)
Supplement: mmc1.pdf [file mmc1.pdf]

Biophysical Journal, Volume 97

**Supporting Material**

**Comparative Molecular Dynamics Simulation Studies of Protegrin-1 Monomer and Dimer in Two Different Lipid Bilayers**

Huan Rui, Jinhyuk Lee, and Wonpil Im

## Supplementary Materials

### **Comparative Molecular Dynamics Simulation Studies of Protegrin-1 Monomer and Dimer in Two Different Membrane Bilayers**

Huan Rui, Jinhyuk Lee, and Wonpil Im<sup>\*</sup>

Department of Molecular Biosciences and Center for Bioinformatics,  
The University of Kansas, Lawrence, Kansas

Keywords: Antimicrobial peptide; Chemical shift; Tilt angle; Conformational change;  
Peptide-lipid interaction

Running Title: PG-1 Interactions in Membranes

---

<sup>\*</sup> Corresponding: [wonpil@ku.edu](mailto:wonpil@ku.edu)

**TABLE S1.** PG-1 simulation systems.

| Systems | Lipids<br>(top/bottom) | Number of<br>waters | Number of ions<br>(K <sup>+</sup> /Cl <sup>-</sup> ) | Number of total<br>atoms |
|---------|------------------------|---------------------|------------------------------------------------------|--------------------------|
| M1_DLPC | DLPC (34/34)           | 3140                | 5/12                                                 | 16947                    |
| M2_DLPC | DLPC (34/34)           | 3162                | 5/12                                                 | 17013                    |
| M3_DLPC | DLPC (34/34)           | 3170                | 5/12                                                 | 17037                    |
| M1_POPC | POPC (32/32)           | 2585                | 5/12                                                 | 16650                    |
| M2_POPC | POPC (32/32)           | 2591                | 5/12                                                 | 16668                    |
| M3_POPC | POPC (32/32)           | 2604                | 5/12                                                 | 16707                    |
| D1_DLPC | DLPC (39/39)           | 3878                | 4/18                                                 | 20528                    |
| D2_DLPC | DLPC (39/39)           | 3899                | 4/18                                                 | 20603                    |
| D3_DLPC | DLPC (39/39)           | 3903                | 4/18                                                 | 20591                    |
| D1_POPC | POPC (37/37)           | 3273                | 4/18                                                 | 20361                    |
| D2_POPC | POPC (37/37)           | 3266                | 4/18                                                 | 20340                    |
| D3_POPC | POPC (37/37)           | 3275                | 4/18                                                 | 20367                    |

**TABLE S2.** PG-1 monomer intramolecular H-bond occupancies in DLPC and POPC bilayers.

| Acceptor<br>(HN) | Donor<br>(O) | Occupancy |         |         |         |         |         |
|------------------|--------------|-----------|---------|---------|---------|---------|---------|
|                  |              | M1_DLPC   | M2_DLPC | M3_DLPC | M1_POPC | M2_POPC | M3_POPC |
| Arg18            | Gly3         | 0.80      | -       | 0.87    | -       | -       | 0.45    |
| Val16            | Leu5         | 1.00      | 0.36    | 0.99    | 0.77    | 0.56    | 1.00    |
| Val14            | Tyr7         | 0.97      | 0.98    | 0.98    | 0.98    | 0.66    | 1.00    |
| Phe12            | Arg9         | 0.57      | 0.99    | 0.98    | -       | 0.96    | 0.95    |
| Arg9             | Phe12        | 0.98      | 0.99    | 1.00    | 0.35    | 0.97    | 0.98    |
| Tyr7             | Val14        | 0.98      | 0.98    | 0.99    | 0.98    | 0.65    | 1.00    |
| Leu5             | Val16        | 1.00      | 0.36    | 1.00    | 0.60    | 0.48    | 0.98    |

**TABLE S3.** H-bond occupancies of PG-1 monomer backbone and lipid in DLPC and POPC bilayers.

| Acceptor<br>(HN) | Occupancy |         |         |         |         |         |
|------------------|-----------|---------|---------|---------|---------|---------|
|                  | M1_DLPC   | M2_DLPC | M3_DLPC | M1_POPC | M2_POPC | M3_POPC |
| Gly2             | -         | 0.50    | -       | 0.16    | -       | 0.39    |
| Gly3             | -         | -       | -       | 0.52    | 0.20    | 0.38    |
| Arg4             | 0.24      | -       | 0.25    | -       | 0.39    | -       |
| Leu5             | -         | -       | -       | 0.23    | -       | -       |
| Cys6             | 0.34      | -       | 0.92    | -       | -       | -       |
| Cys8             | -         | -       | -       | 0.37    | 0.67    | -       |
| Arg10            | -         | -       | 0.66    | -       | 0.81    | -       |
| Arg11            | -         | 0.30    | -       | 0.67    | 0.32    | 0.46    |
| Phe12            | -         | -       | -       | 0.46    | -       | -       |
| Cys15            | -         | 0.72    | 0.42    | -       | -       | -       |
| Gly17            | -         | 0.42    | 0.57    | -       | 0.18    | 0.26    |
| Arg18            | -         | 0.33    | -       | -       | -       | 0.17    |

**TABLE S4.** Intermolecular H-bond occupancies of PG-1 dimer<sup>§</sup> in DLPC bilayers.

| PROA    |      | PROB    |      | Occupancy |         |         |         |         |         |
|---------|------|---------|------|-----------|---------|---------|---------|---------|---------|
| Residue | Atom | Residue | Atom | D1_DLPC   | D2_DLPC | D3_DLPC | D1_POPC | D2_POPC | D3_POPC |
| CYS13   | HN   | ARG11   | O    | 0.88      | 0.25    | 0.67    | 0.76    | 0.93    | 0.83    |
| CYS13   | O    | CYS13   | HN   | 0.98      | 0.96    | 0.82    | 0.81    | 0.85    | 0.92    |
| CYS15   | HN   | CYS13   | O    | 0.99      | 0.99    | 0.98    | 1.00    | 1.00    | 1.00    |
| CYS15   | O    | CYS15   | HN   | 0.99      | 0.97    | 0.86    | 1.00    | 1.00    | 0.98    |
| GLY17   | HN   | CYS15   | O    | -         | -       | -       | 0.38    | 0.89    | 0.98    |
| GLY17   | O    | GLY17   | HN   | -         | -       | -       | -       | 0.38    | -       |

<sup>§</sup>PROA and PROB are the names of monomers in the PG-1 dimer

**TABLE S5.** H-bond occupancies between PG-1 dimer<sup>§</sup> backbone and lipid molecules.

| Acceptor<br>(HN) | Occupancy |      |         |      |         |      |         |      |         |      |         |      |
|------------------|-----------|------|---------|------|---------|------|---------|------|---------|------|---------|------|
|                  | D1_DLPC   |      | D2_DLPC |      | D3_DLPC |      | D1_POPC |      | D2_POPC |      | D3_POPC |      |
|                  | PROA      | PROB | PROA    | PROB | PROA    | PROB | PROA    | PROB | PROA    | PROB | PROA    | PROB |
| GLY2             | 0.99      | -    | -       | 0.87 | 0.42    | -    | 0.25    | 0.58 | 0.53    | 0.42 | -       | -    |
| GLY3             | 0.98      | -    | 0.66    | -    | 0.57    | -    | 0.56    | -    | 0.64    | 0.54 | -       | 0.74 |
| ARG4             | 0.95      | 0.77 | 0.63    | -    | 0.40    | -    | 0.51    | -    | 0.50    | 0.15 | 0.17    | 0.86 |
| LEU5             | -         | 0.49 | -       | -    | -       | -    | -       | -    | -       | -    | -       | -    |
| CYS6             | -         | 0.44 | -       | -    | -       | 0.56 | -       | -    | 0.26    | -    | 0.29    | -    |
| CYS8             | 0.64      | -    | -       | 0.90 | 0.72    | -    | -       | -    | -       | -    | -       | -    |
| ARG10            | -         | 0.23 | 0.18    | -    | 0.54    | -    | -       | -    | 0.62    | 0.20 | -       | 0.99 |
| ARG11            | -         | -    | -       | -    | 0.47    | 0.27 | -       | -    | 0.62    | 0.95 | -       | -    |
| GLY17            | -         | -    | 0.36    | 0.75 | 0.87    | 0.99 | -       | -    | -       | -    | -       | -    |
| ARG18            | 0.16      | 0.39 | -       | -    | 0.24    | 0.92 | -       | -    | -       | -    | -       | -    |

<sup>§</sup>PROA and PROB are the names of monomers in the PG-1 dimer

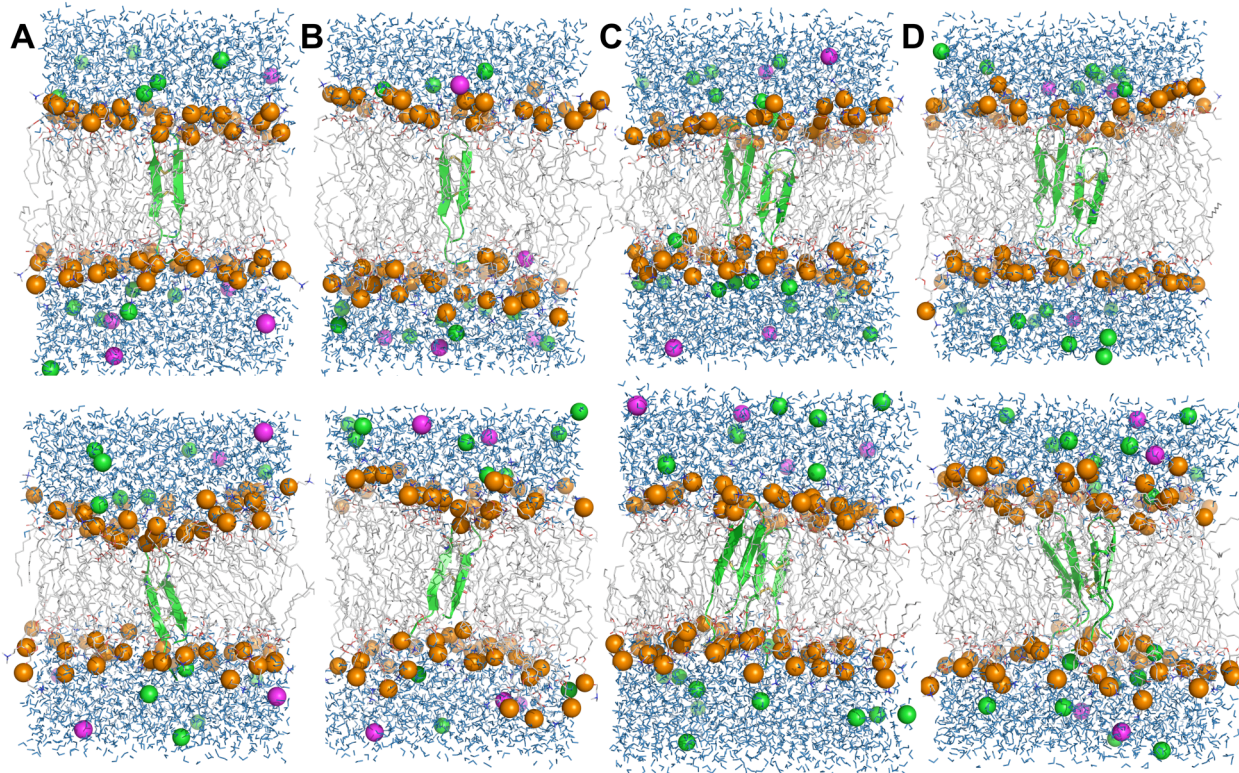

**FIGURE S1.** Molecular representation of the initial (top) and final (bottom) structures of PG-1 monomer and dimer in DLPC and POPC bilayers: (A) M1\_DLPC, (B) M1\_POPC, (C) D1\_DLPC, and (D) D1\_POPC. The secondary structure of PG-1 (*green*) is shown. Lipid molecules (*grey*) are illustrated by lines. Phosphate atoms (*orange*) are shown in spheres to illustrate the hydrophobic/hydrophilic interface. Water molecules (*blue*) are shown in lines. 0.2 M  $K^+$  (*magenta*) and  $Cl^-$  (*green*) are also presented with spheres. The figure is produced with PyMOL (61).



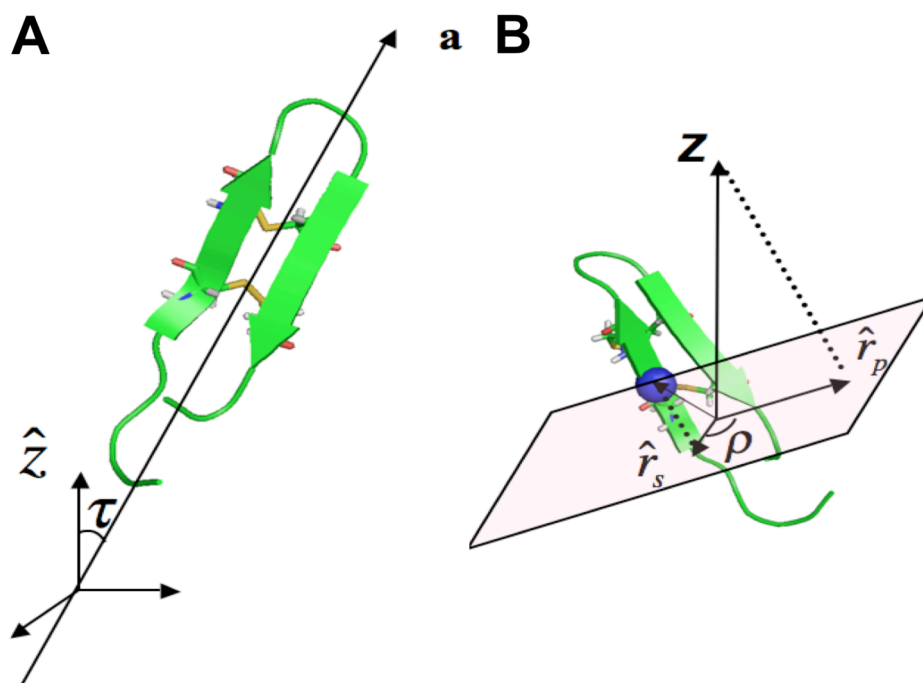

**FIGURE S2.** Definitions of (A) tilt angle ( $\tau$ ) and (B) rotation angle ( $\rho$ ). PG-1 monomer (*green*) is shown in cartoon representation. The disulfide bonds (*yellow*) are shown in sticks. The hairpin axis (**a**) is the eigenvector that corresponds to the smallest eigenvalue.  $\hat{\mathbf{r}}_p$  is the projection of the Z-axis on the plane (*pink*) made by the second and third principal axes.  $\hat{\mathbf{r}}_s$  is the perpendicular vector from **a** to the reference atom N on Cys6 (*blue sphere*).

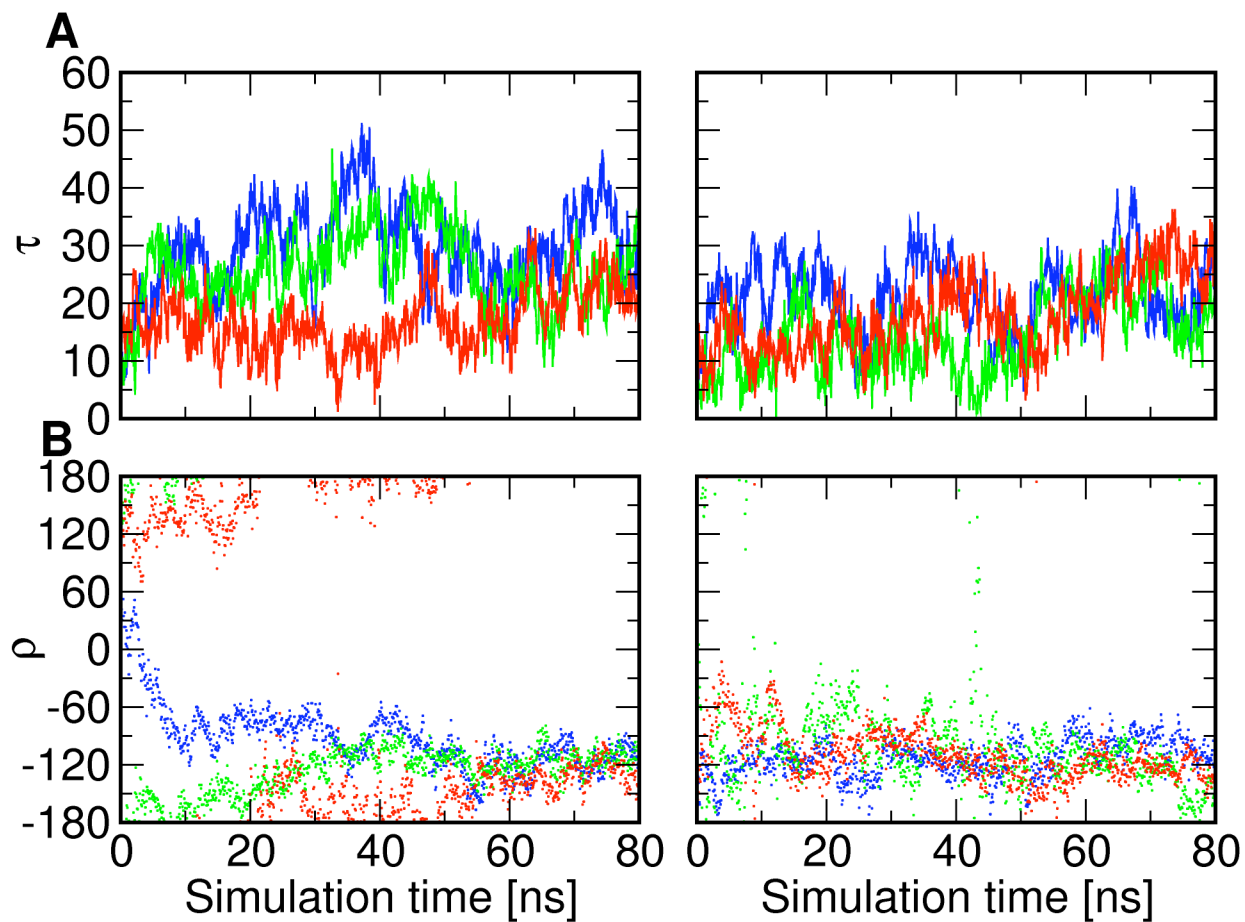

**FIGURE S3.** The tilt angle ( $\tau$ ) and rotation angle ( $\rho$ ) time profile of the PG-1 monomers in different bilayers: (A) Tilt angles in the DLPC bilayers (*left*) and POPC bilayers (*right*). (B) Rotation angles in the DLPC bilayers (*left*) and POPC bilayers (*right*). Systems M1 (*blue*), M2 (*green*), and M3 (*red*) are shown in different color for a clear view. Note that  $\rho$  is not well defined when  $\tau$  is very small by definition.

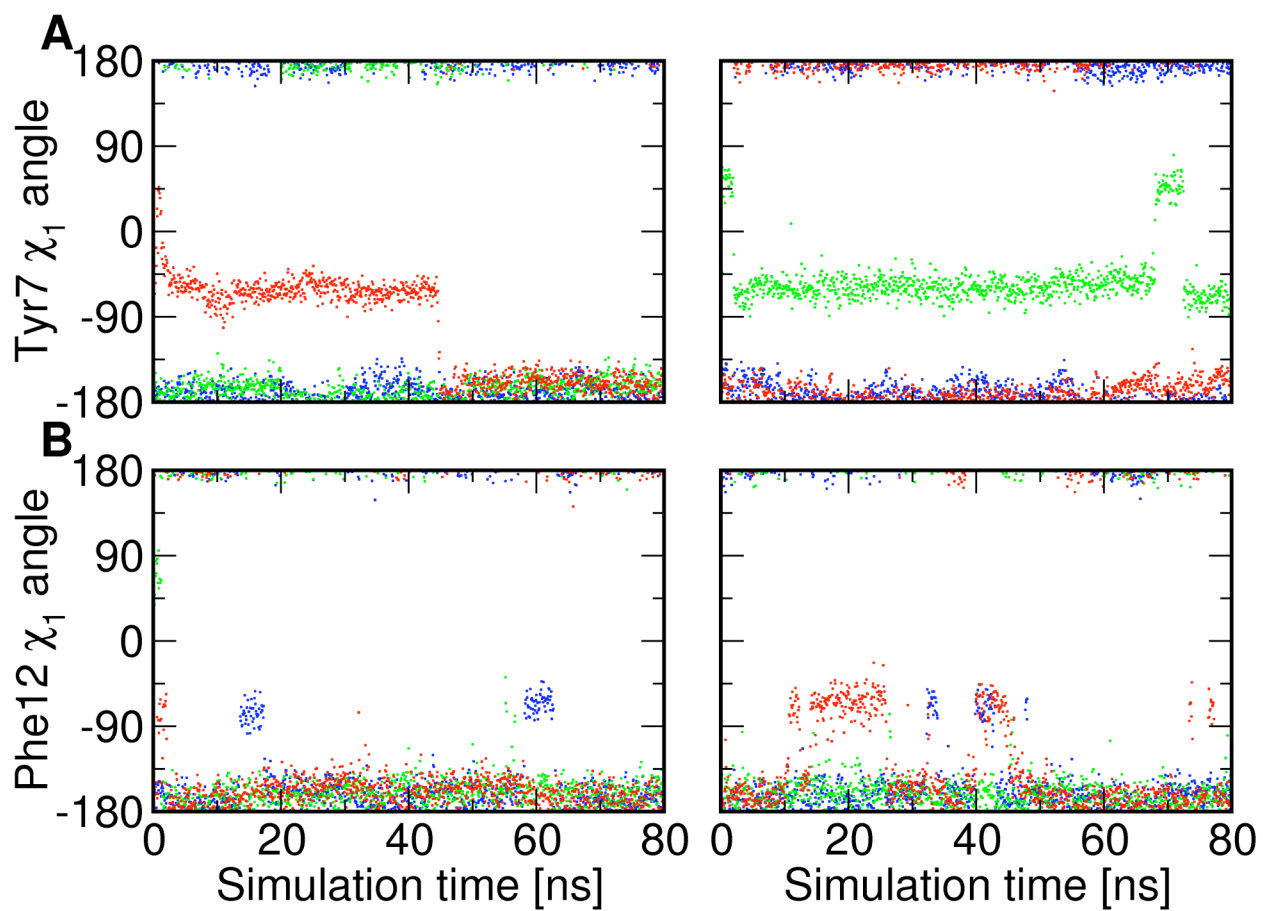

**FIGURE S4.** The side chain rotamer  $\chi_1$  angle for (A) Tyr7 in systems containing DLPC (*left*) and POPC (*right*) bilayers. (B) Phe12 in systems containing DLPC (*left*) and POPC (*right*) bilayers. System M1 (*blue*), M2 (*green*) and M3 (*red*) are represented by different color for clarity.

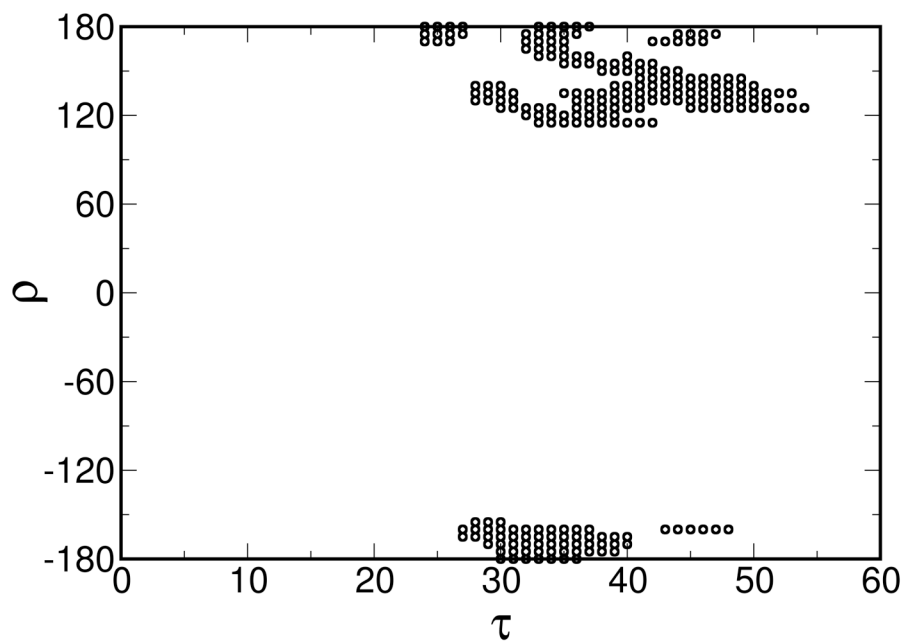

**FIGURE S5.** The orientation of PG-1 solution NMR structures with chemical shifts root mean-square deviation ( $\delta_\sigma$ ) less than 4 ppm.

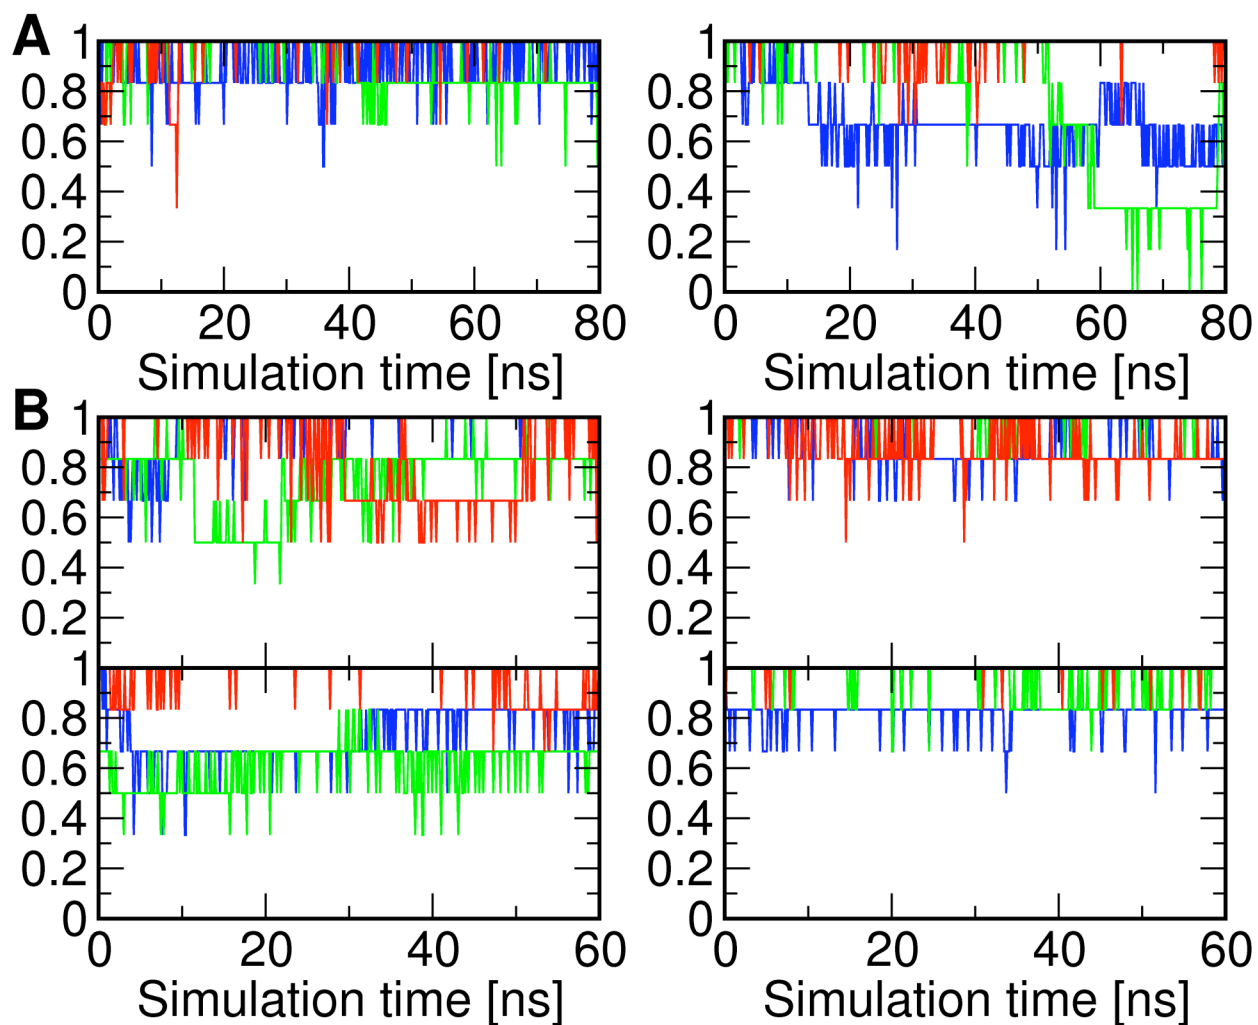

**FIGURE S6.** (A) The intramolecular H-bond fraction of PG-1 monomer in DLPC (*left*) and POPC (*right*) bilayers. (B) The intramolecular H-bond fraction of PG-1 dimer monomer A (*top*) and monomer B (*bottom*) in DLPC (*left*) and POPC (*right*) bilayers. Systems M1 (*blue*), M2 (*green*), M3 (*red*), D1 (*blue*), D2 (*green*), and D3 (*red*) are shown in different color for clarity.

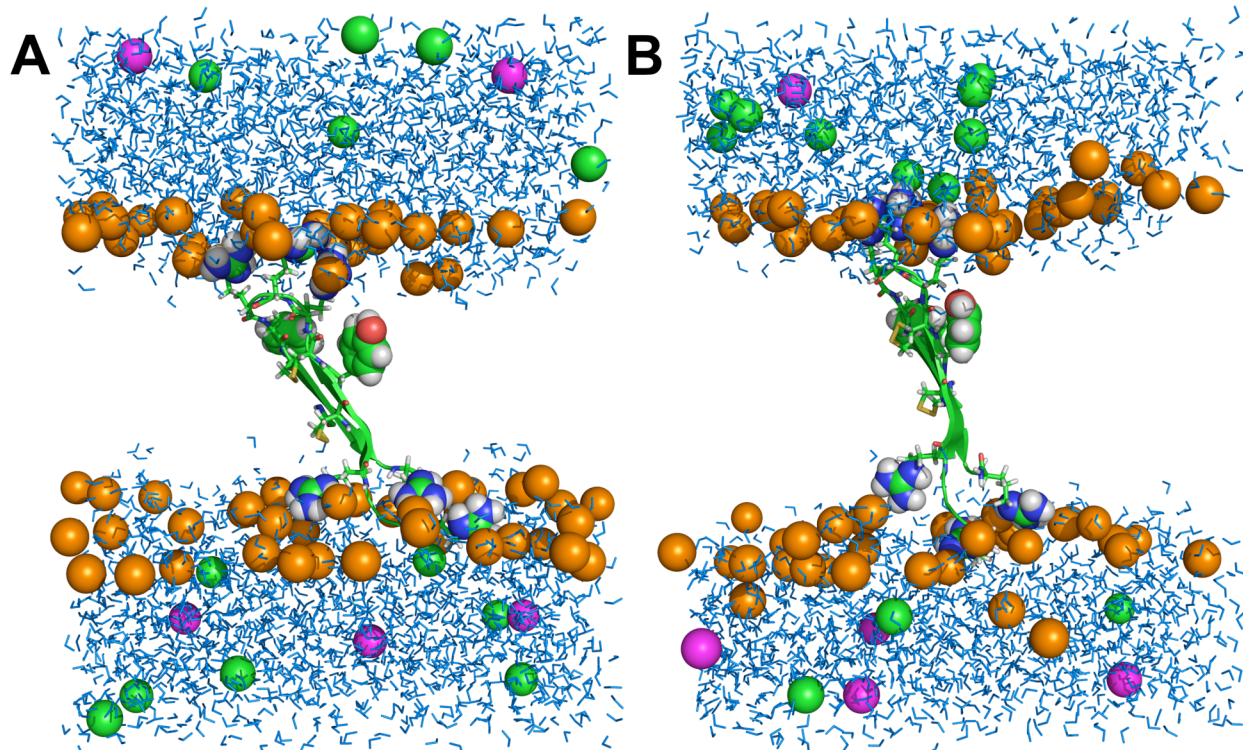

**FIGURE S7.** The snapshots of PG-1 monomer in system M1 in (A) DLPC and (B) POPC at 20 ns. PG-1 (*green*) is shown in cartoon representation with the N-terminal strand pointing outwards. The disulfide bonds (*yellow*) are shown in sticks. The guanidinium groups as well as side chains of Tyr7 and Phe12 are represented in spheres. The lipid tails are not shown for clarity. The phosphate atoms (*orange spheres*) are shown to illustrate the hydrophobic/hydrophilic interface. The water molecules (*blue*),  $K^+$  (*magenta*), and  $Cl^-$  (*green*) are also shown.

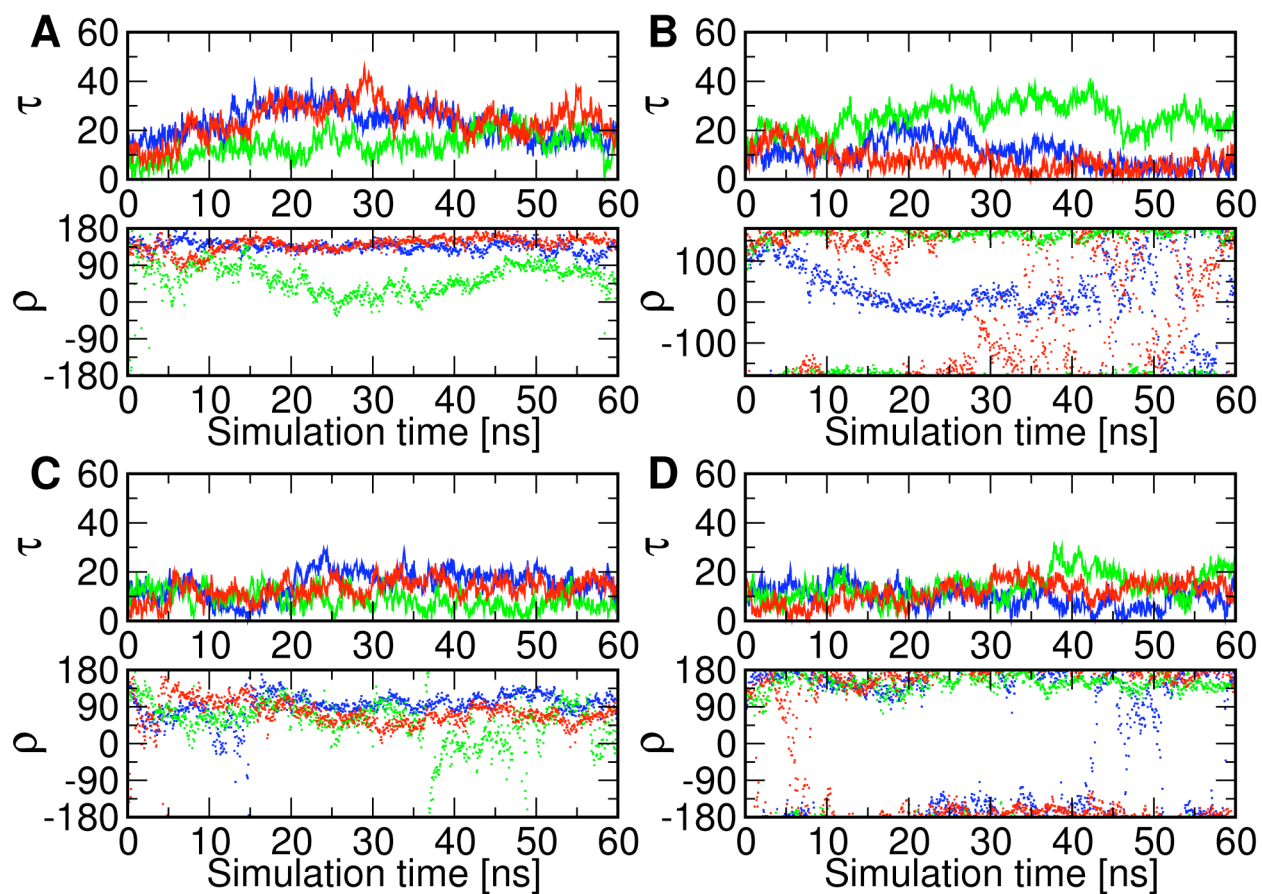

**FIGURE S8.** The tilt angle ( $\tau$ ) and rotation angle ( $\rho$ ) time profile of monomers in PG-1 dimer in different bilayers: (A) monomer A and (B) monomer B in the DLPC bilayers, and (C) monomer A and (D) monomer B in the POPC bilayers. Systems D1 (*blue*), D2 (*green*), and D3 (*red*) are shown in different color for a clear view. Note that  $\rho$  is not well defined when  $\tau$  is very small by definition.

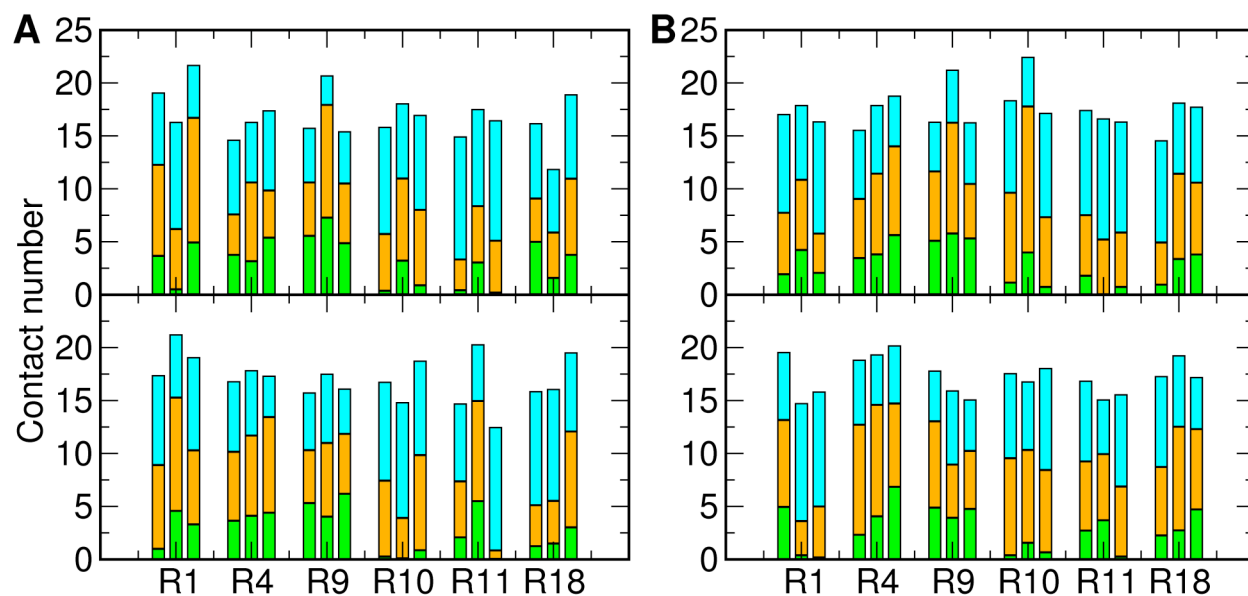

**FIGURE S9.** Average contact numbers of guanidinium-water (*cyan*), guanidinium-lipid head groups (*orange*), and guanidinium-lipid tails (*green*) in (A) monomer A (*top*) and monomer B (*bottom*) of PG-1 dimer in the DLPC bilayers, and (B) monomer A (*top*) and monomer B (*bottom*) of PG-1 dimer in the POPC bilayers. Atoms within 4.5 Å are counted as interacting pairs. The results from system D1 (*left*), D2 (*middle*), and D3 (*right*) are shown for each arginine residue.
